# Supplementary material for: Analgesic Efficacy, Practicality and Safety of Inhaled Methoxyflurane Versus Standard Analgesic Treatment for Acute Trauma Pain in the Emergency Setting: A Randomised, Open-Label, Active-Controlled, Multicentre Trial in Italy (MEDITA)
Source: PubMed Central journal article supplement — Adv Ther. 2019 Oct 12;36(11):3030–46. doi: 10.1007/s12325-019-01055-9 (PMC6822789; doi:10.1007/s12325-019-01055-9), 2019-10-12
Supplement: 12325_2019_1055_MOESM1_ESM.pdf [file 12325_2019_1055_MOESM1_ESM.pdf]

**Table S1. Change in VAS pain intensity by injury type**

| Injury Type | Time point (min) | Estimated mean change from baseline (95% confidence interval) |                              |
|-------------|------------------|---------------------------------------------------------------|------------------------------|
|             |                  | Methoxyflurane                                                | Standard analgesic treatment |
| Contusion   | 3                | -7.90 (-11.53, 4.26)                                          | -3.35 (-6.15, -0.55)         |
|             | 5                | -17.21 (-23.01, -11.40)                                       | -10.53 (-14.28, -6.78)       |
|             | 10               | -24.59 (-31.10, -18.08)                                       | -18.92 (-23.56, -14.28)      |
|             | 15               | -29.49 (-36.27, -22.70)                                       | -24.16 (-29.67, -18.65)      |
|             | 20               | -33.26 (-40.41, -26.10)                                       | -27.08 (-33.08, -21.08)      |
|             | 25               | -37.47 (-44.92, -30.03)                                       | -30.74 (-36.94, -24.53)      |
|             | 30               | -39.58 (-47.27, -31.89)                                       | -34.97 (-41.73, -28.22)      |
| Dislocation | 3                | -4.28 (-9.02, -0.47)                                          | -3.53 (-5.65, -1.41)         |
|             | 5                | -15.14 (-19.93, -10.35)                                       | -8.34 (-11.54, -5.14)        |
|             | 10               | -25.34 (-31.07, -19.62)                                       | -14.28 (-18.40, -10.16)      |
|             | 15               | -31.28 (-38.11, -24.44)                                       | -22.88 (-28.96, -16.79)      |
|             | 20               | -35.36 (-42.77, -27.94)                                       | -25.78 (-31.66, -19.90)      |
|             | 25               | -37.50 (-45.64, -29.36)                                       | -29.91 (-36.77, -23.04)      |
|             | 30               | -42.29 (-50.64, -33.93)                                       | -34.16 (-41.52, -26.80)      |
| Fracture    | 3                | -6.22 (-8.95, -3.49)                                          | -1.43 (-3.60, -0.74)         |
|             | 5                | -13.70 (-17.66, -9.75)                                        | -6.06 (-9.00, -3.03)         |
|             | 10               | -21.47 (-26.36, -16.58)                                       | -14.20 (-18.01, -10.39)      |
|             | 15               | -27.05 (-32.04, -22.05)                                       | -21.84 (-26.32, -17.37)      |
|             | 20               | -31.08 (-36.33, -25.83)                                       | -25.51 (-30.33, -20.69)      |
|             | 25               | -36.08 (-41.42, -30.74)                                       | -31.75 (-36.83, -26.67)      |
|             | 30               | -40.89 (-46.29, -35.48)                                       | -35.73 (-41.06, -30.40)      |

VAS: visual analogue scale.

**Supplementary Table 2. List of Ethics committees**

| <b>Center</b> | <b>Principal Investigator</b> | <b>Ethics committee</b>                                                                                                               | <b>Notes</b>   |
|---------------|-------------------------------|---------------------------------------------------------------------------------------------------------------------------------------|----------------|
| 1             | Ruggiano                      | COMITATO ETICO REGIONE TOSCANA - AREA VASTA CENTRO                                                                                    | "Master"       |
| 2             | Bartoli                       | COMITATO ETICO CATANIA 1                                                                                                              |                |
| 3             | Carpinteri                    | COMITATO ETICO CATANIA 1                                                                                                              |                |
| 4             | Fabbri                        | COMITATO ETICO IRST IRCCS E AVR                                                                                                       |                |
| 5             | Bermano                       | COMITATO ETICO REGIONALE DELLA LIGURIA                                                                                                |                |
| 8             | Chiesa                        | COMITATO ETICO PER LA SPERIMENTAZIONE CLINICA DELLA PROVINCIA DI PADOVA                                                               |                |
| 9             | Mura                          | COMITATO ETICO ATS SARDEGNA                                                                                                           | Center retired |
| 10            | Oppes                         | Comitato Etico Indipendente dell'Azienda Ospedaliero Universitaria di Cagliari                                                        |                |
| 11            | Masciari                      | COMITATO ETICO REGIONE CALABRIA SEZ. AREA CENTRO                                                                                      |                |
| 12            | Torti                         | COMITATO ETICO INTERAZIENDALE AOU CITTÀ DELLA SALUTE E DELLA SCIENZA DI TORINO - AO ORDINE MAURIZIANO DI TORINO - ASL CITTÀ DI TORINO |                |
| 13            | Iorno                         | COMITATO ETICO MILANO AREA 2                                                                                                          |                |
| 14            | Voza                          | COMITATO ETICO INDIPENDENTE IRCCS ISTITUTO CLINICO HUMANITAS                                                                          |                |
| 15            | Serra                         | COMITATO ETICO DELLA ROMAGNA                                                                                                          |                |
| 16            | Gangitano                     | COMITATO ETICO DELLA ROMAGNA                                                                                                          |                |
| 17            | Francesconi                   | COMITATO ETICO DELLA ROMAGNA                                                                                                          |                |
| 18            | Paolini                       | COMITATO ETICO AREA VASTA CENTRO                                                                                                      |                |
